# Supplementary material for: Urine-Based Nematode Chemotaxis Assay (N-NOSE) as a Predictor of Recurrence After Curative Surgery for Resectable Pancreatic Cancer: A Single-Center Prospective Study
Source: Research Square preprint supplement (doi:10.21203/rs.3.rs-7492933/v1), 2025-09-15
Supplement: Supplementary file 1 [file 2524e3159f8d35d6711a7100.docx]

**Supplemental Table 1. Comparison of patient characteristics between recurrence group and non-recurrence group**

|  | Recurrence group  (n=13) | Non-recurrence group  (n=11) | *p*-value |
| --- | --- | --- | --- |
| Age (years) | 75 [60-80] | 77 [60-82] | 0.62 |
| Sex | Male: 6 (46.2%)  Female: 7 (53.8%) | Male: 3 (27.3%)  Female: 8 (72.7%) | 0.34 |
| BMI (kg/m2) | 20.3 [17.2-25.9] | 22.4 [18.9-32.1] | 0.27 |
| PNI before treatment | 45.6 [39.2-55.7] | 46.6 [39.4-50.5] | 0.93 |
| NLR before treatment | 2.37 [1.24-14.09] | 1.93 [1.01-3.44] | 0.54 |
| PLR before treatment | 1.68 [0.83-3.44] | 1.47 [0.71-2.17] | 0.12 |
| LMR before treatment | 3.55 [1.71-6.30] | 3.79 [2.09-4.96] | 0.91 |
| Diabetes mellitus | 5 (38.5%) | 7 (63.6%) | 0.22 |
| HbA1c before treatment | 6.1 [5.5-11.4] | 7.1 [5.7-10.7] | 0.37 |
| CEA before treatment | 3.1 [1.1-10.9] | 3.2 [0.9-16.6] | 0.50 |
| CA19-9 before treatment | 153 [7.2-4588] | 118 [11-2896] | 0.79 |
| CEA after preoperative chemotherapy | 3.3 [0.8-6.0] | 3.3 [1.8-3.8] | 0.87 |
| CA19-9 after preoperative chemotherapy | 39 [-684] | 42 [5-215] | 0.87 |
| CEA after surgery | 1.7 [0.7-5.6] | 2.3 [1.2-3.3] | 0.53 |
| CA19-9 after surgery | 16 [5.7-424] | 10 [5-41] | 0.42 |
| Intraoperative blood loss (ml) | 470 [10-2270] | 375 [0-1945] | 0.74 |
| Postoperative severe complication | 4 (30.8%) | 2 (18.2%) | 0.48 |
| Tumor size (mm) | 25 [5-41] | 21 [5-70] | 0.56 |
| Pathological T stage✝ | T1: 2 (15.4%)  T2: 9 (69.2%)  T3: 2 (15.4%) | T1: 4 (36.4%)  T2: 6 (54.6%)  T3: 1 (9.1%) | 0.49 |
| Pathological N stage✝ | N0: 4 (30.8%)  N1: 9 (69.2%)  N2: 0 (0.0%) | N0: 8 (72.7%)  N1: 1 (9.1%)  N2: 2 (18.2%) | 0.008** |
| Final Stage✝ | 1A: 1 (7.7%)  1B: 3 (23.1%)  2: 9 (69.2%)  3: 0 (0.0%) | 1A: 3 (27.3%)  1B: 5 (45.5%)  2: 1 (9.1%)  3: 2 (18.2%) | 0.02* |
| v (+)§ | 12 (92.3%) | 7 (63.6%) | 0.08 |
| ly (+)§ | 10 (76.9%) | 6 (54.6%) | 0.25 |
| ne (+)§ | 11 (84.6%) | 6 (54.6%) | 0.11 |
| S (+)§ | 9 (69.2%) | 8 (72.7%) | 0.85 |
| RP (+)§ | 7 (53.9%) | 7 (63.6%) | 0.63 |
| PL (+)§ | 3 (27.3%) | 1 (10.0%) | 0.31 |
| Treatment effect of preoperative chemotherapy¶ | Ⅰ: 2 (15.4%)  Ⅱa: 10 (76.9%)  Ⅱb: 0 (0.0%)  Ⅲ: 1 (7.7%) | Ⅰ: 1 (9.1%)  Ⅱa: 6 (54.6%)  Ⅱb: 3 (27.3%)  Ⅲ: 1 (9.1%) | 0.24 |
| N-NOSE positive before treatment | 13 (100.0%) | 7 (63.6%) | 0.02* |
| N-NOSE positive after preoperative chemotherapy | 5 (41.7%) | 6 (60.0%) | 0.39 |
| N-NOSE positive after surgery | 10 (76.9%) | 7 (70.0%) | 0.71 |

Data are expressed as median (range) or number of patients (percentage).

✝: the UICC TMN classification (8th edition)

§: Japanese classification of pancreatic carcinoma by the Japan Pancreas Society: Eighth edition

¶: Evans classification

BMI: body mass index

NAC: neo adjuvant chemotherapy

PNI: prognostic nutritional index=10×albumin(g/dl) + 0.005× the absolute lymphocyte count

NLR: neutrophil to lymphocyte ratio

PLR: platelet to lymphocyte ratio

LMR: lymphocyte to monocyto ratio

CEA: carcinoembryonic antigen

CA19-9: carbohydrate antigen 19-9

v: pathological vessel invasion

ly: pathological lymphatic invasion

ne: pathological pancreatic nerve invasion

S: pathological serosal invasion

RP: pathological retroperitoneal invasion

PL: pathological nerve plexus invasion

*: p< 0.05 **: p< 0.01 ***: p< 0.001
